# Supplementary material for: Oncogenic RIT1 mutations in lung adenocarcinoma
Source: PubMed Central journal article supplement — Oncogene. 2014 Jan 27;33(35):4418–23. doi: 10.1038/onc.2013.581 (PMC4150988; doi:10.1038/onc.2013.581), 2014-01-27
Supplement: 41388_2014_BFonc2013581_MOESM15_ESM.pdf [file 41388_2014_BFonc2013581_MOESM15_ESM.pdf]

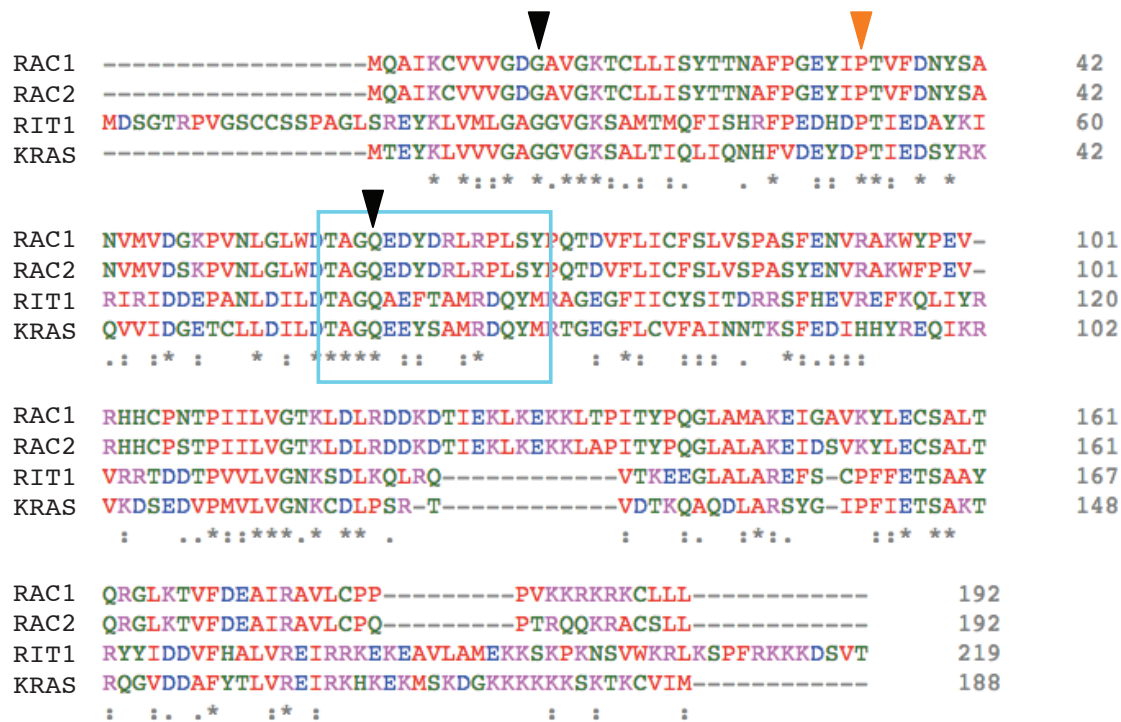

### Supplementary Figure 1 | Protein sequence alignment of RAC, RAS, and RIT1 small

**GTPases.** Protein sequence alignment of RAC1, RAC2, KRAS, and RIT1 sequences generated using ClustalW<sup>54</sup>. The numbers on the right indicate amino acid position. \*, identical amino acid. :, strongly similar amino acid. ., weakly similar amino acid. Black arrows indicate the G12 and Q61 mutation hotspots in *KRAS*. An orange arrow indicates the P29 hotspot in *RAC1*. A blue box indicates the switch II domain mutational hotspot identified in *RIT1* in the present study.

Sequences were obtained from [www.ensembl.org](http://www.ensembl.org) and correspond to the following transcripts: RAC1, ENST00000348035. RAC2, ENST00000249071. KRAS, ENST00000311936. RIT1, ENST00000368323.

**a**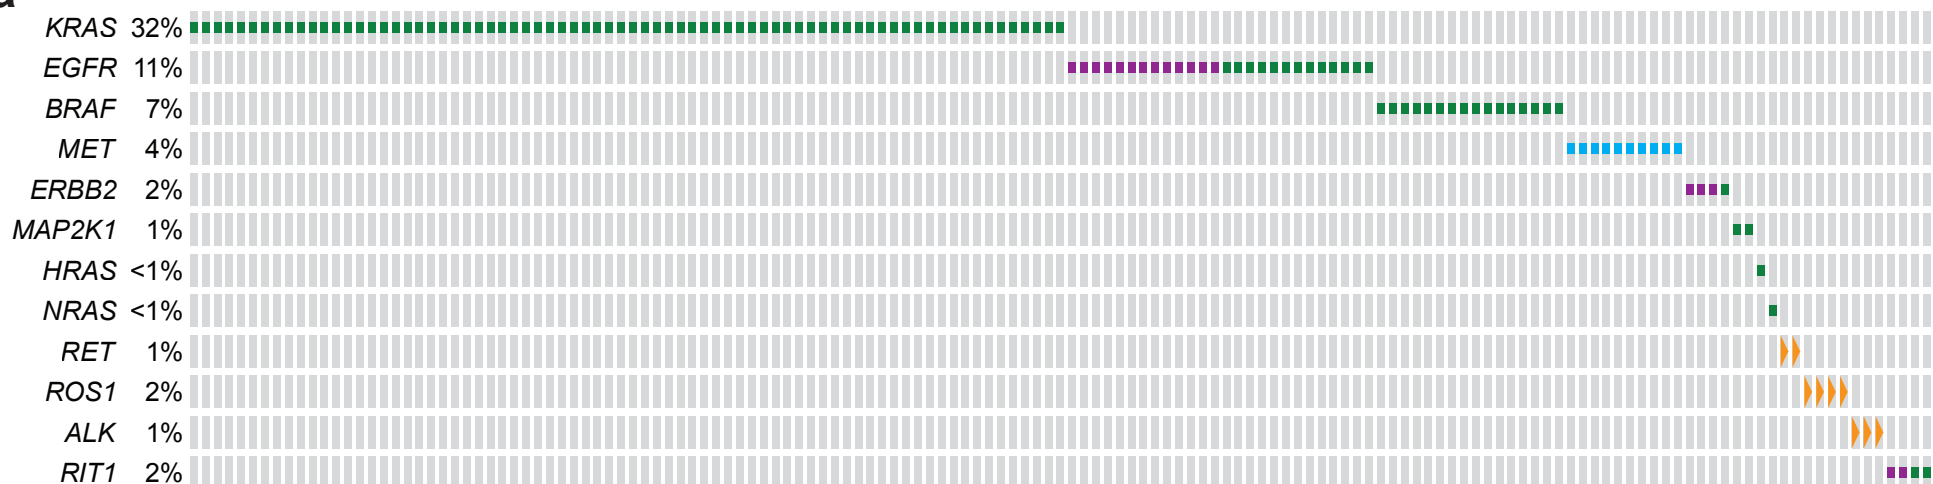**b**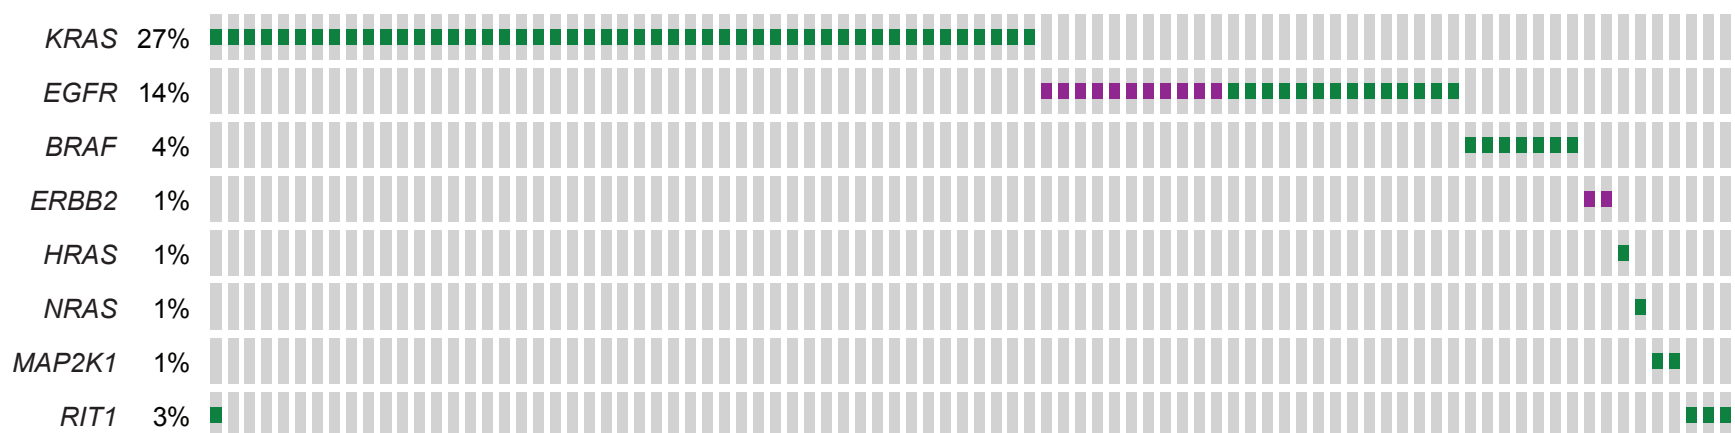

**Supplementary Figure 2 | Mutual exclusivity of *RIT1* and other driver mutations in lung adenocarcinoma.** **a**, Depiction of mutation data from 230 samples from The Cancer Genome Atlas lung adenocarcinoma sequencing study, displayed using the MSKCC cBio portal (<http://cbio.mskcc.org>). Each column represents a sample; each row corresponds to a different gene. Samples lacking alterations in the genes shown are not displayed. Green box: missense mutation present, purple box: in-frame insertion/deletion, orange triangles: fusion event, blue box: *MET* exon 14 skipping. For all genes except *RIT1*, only mutations of known significance are displayed. Numbers indicate the percentage of samples in the cohort with mutation in the respective gene. **b**, Data from 183 lung adenocarcinomas described in Imielinski et al.<sup>1</sup>, depicted as in (**a**). Fusion genes and exon skipping were not analyzed.

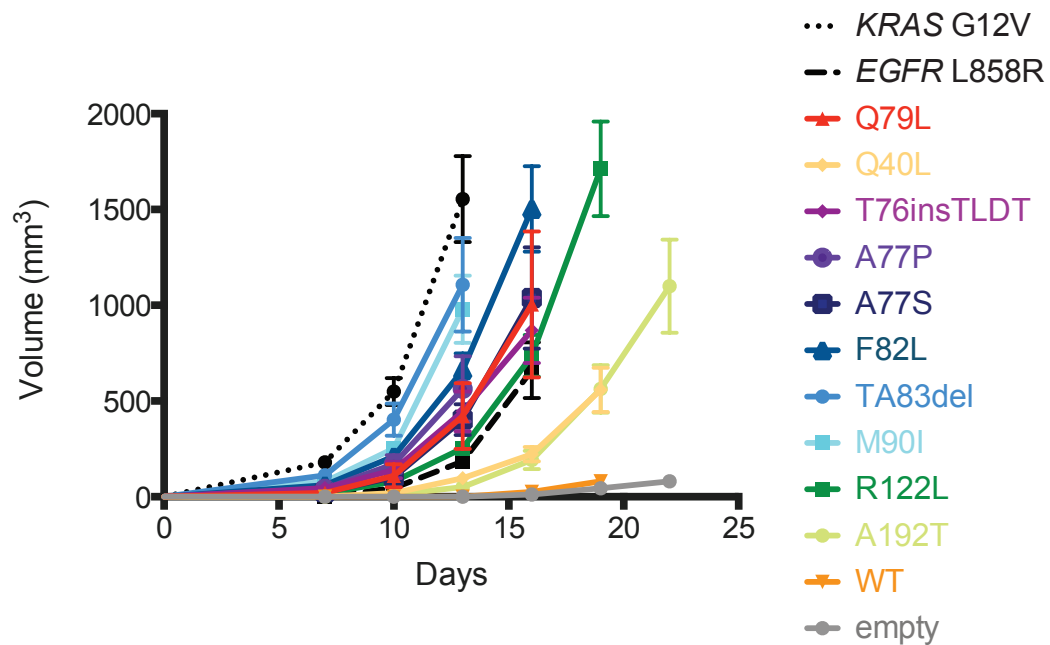

**Supplementary Figure 3 | Transforming capability of somatic *RIT1* mutants.** NIH3T3 cells were transduced with retrovirus to induce expression of wild-type *RIT1* (WT), mutated *RIT1*, empty vector, or known oncogenic mutations (*KRAS* G12V, *EGFR* L858R) as positive controls. After selection with puromycin, cells were expanded and  $2 \times 10^5$  cells injected per site subcutaneously into the flanks of nude mice. Beginning at day 7 post-injection, tumors were measured every three days with a digital caliper. Data shown is mean+SEM at each timepoint, n = 9 injection sites per condition.

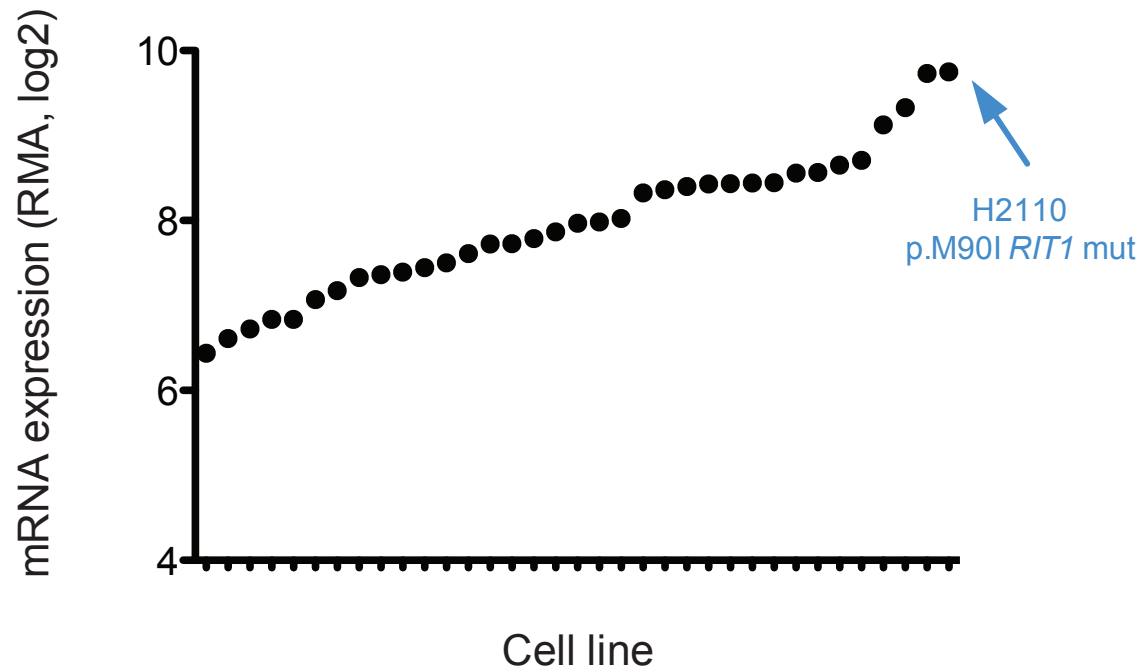

**Supplementary Figure 4 | RNA expression of *RIT1* in driver-negative non-squamous NSCLC lines.** We queried genotype data from the Cancer Cell Line Encyclopedia (CCLE) and identified 35 driver-negative non-squamous NSCLC lines with gene expression data (Supplementary Table 4). Data shown is the log<sub>2</sub> robust multi-array average (RMA) of *RIT1*, generated as described<sup>27</sup> from the 35 cell lines, sorted in order of lowest to highest *RIT1* expression.

Berger et al. Supplementary Table 1

| Dataset | Sample ID             | Age | Gender | Histopathology Review          | Stage | Protein change | mRNA change           | Allelic fraction |
|---------|-----------------------|-----|--------|--------------------------------|-------|----------------|-----------------------|------------------|
| Broad   | LUAD-E00934           | 58  | M      | Acinar predominant Adc         | IB    | p.Q40L         | c.119A>T              | 0.12             |
| Broad   | LUAD-S01345           | 74  | M      | Solid predominant Adc          | IB    | p.A77P         | c.229G>C              | 0.13             |
| Broad   | LUAD-CHTN-MAD06-00490 | 36  | F      | Micropapillary predominant Adc | NA    | p.M90I         | c.270G>A              | 0.15             |
| Broad   | LUAD-S00499           | 72  | F      | Acinar predominant Adc         | IIIA  | p.R122L        | c.365G>T              | 0.25             |
| Broad   | LUAD-NYU627           | 67  | F      | Papillary predominant Adc      | IA    | p.A192T        | c.574G>A              | 0.17             |
| TCGA    | TCGA-44-6779          | 50  | F      | Solid predominant Adc          | IIB   | p.76_76T>TLDT  | c.227_228insTTTGGATAC | 0.16             |
| TCGA    | TCGA-55-1596          | 55  | M      | Solid predominant Adc          | IIB   | p.F82L         | c.246T>G              | 0.38             |
| TCGA    | TCGA-73-4675          | 59  | M      | Micropapillary predominant Adc | IIIA  | p.TA83del      | c.248_253delCAGCCA    | 0.50             |
| TCGA    | TCGA-05-4384          | 66  | M      | Papillary predominant Adc      | IIIA  | p.M90I         | c.270G>T              | 0.31             |
| TCGA    | TCGA-49-4514          | 79  | F      | Papillary predominant Adc      | IA    | p.M90I         | c.270G>T              | 0.20             |

**Supplementary Table 1.** Clinical and genomic data of *RIT1*-mutated tumors identified in Broad<sup>1</sup> and TCGA datasets.

Berger et al. Supplementary Table 2

| <b>Tumor Type</b>          | <b>n, samples</b> | <b>n, mutations</b> | <b>Reference</b>              |
|----------------------------|-------------------|---------------------|-------------------------------|
| Glioblastoma               | 91                | 0                   | 44                            |
| Prostate                   | 103               | 0                   | 45                            |
| Sarcoma                    | 207               | 0                   | 46                            |
| Ovarian                    | 316               | 0                   | 47                            |
| Breast                     | 507               | 0                   | 48                            |
| Squamous cell lung cancer  | 178               | 2                   | 49                            |
| Colorectal                 | 224               | 2                   | 50                            |
| Pancreatic                 | 142               | 0                   | 51                            |
| Acute myelogenous leukemia | 200               | 1 (p.M90I)          | 52                            |
| Endometrial                | 248               | 3                   | 53                            |
| Cervical                   | 36                | 1 (p.M90I)          | <i>TCGA<br/>(unpublished)</i> |

**Supplementary Table 2.** Survey of *RIT1* mutations in varied tumor types. Data from the eleven tumor types were queried in the MSKCC cbio portal (<http://cbioportal.org>) or from The Cancer Genome Atlas portal ([tcga-portal.nci.nih.gov/](http://tcgaPortal.nci.nih.gov/)) or from the references cited. Parentheses indicate specific amino acid changes also seen in the present study.

Berger et al. Supplementary Table 3

| Variant | Tumor type                          | Reference    | Soft agar | Foci |
|---------|-------------------------------------|--------------|-----------|------|
| S10del  | endometrial                         | COSMIC       | -         | -    |
| K23E    | salivary gland; lung adenocarcinoma | COSMIC; TCGA | +         | n.d. |
| T38A    | endometrial                         | COSMIC       | +         | +    |
| R45Q    | endometrial                         | COSMIC       | -         | -    |
| D51V    | chronic myelogenous leukemia        | COSMIC       | +         | +    |
| L74M    | colon                               | COSMIC       | +         | +/-  |
| E81G    | myeloid malignancies                | 23           | +         | +    |
| E81Q    | melanoma; myeloid malignancies      | COSMIC; 23   | +         | +    |
| F82C    | myeloid malignancies                | 23           | +         | +    |
| F82J    | myeloid malignancies                | 23           | +         | +/-  |
| F82V    | myeloid malignancies                | 23           | +         | +/-  |
| D87N    | salivary gland                      | COSMIC       | +         | +    |
| R112C   | melanoma                            | COSMIC       | -         | -    |
| P159F   | melanoma                            | COSMIC       | -         | -    |
| A165S   | lung adenocarcinoma                 | TCGA         | +/-       | -    |
| D173N   | lung adenocarcinoma                 | TCGA         | -         | -    |

**Supplementary Table 3.** Transforming capability of *RIT1* mutations from diverse tumor subtypes. Somatic *RIT1* mutations were identified in the COSMIC database (v67)<sup>26</sup>, reported in Gómez-Seguí et al.<sup>23</sup>, or present in additional TCGA lung adenocarcinoma samples not analyzed in the 230 tumor study (<https://tcga-data.nci.nih.gov/tcga/>). NIH3T3 cells were transduced with retrovirus, selected with puromycin, and seeded in soft agar to determine colony-forming potential. Foci formation was determined after cells were grown to confluence in 10 cm dishes and transformed foci evaluated by quantification of foci in three fields/condition. +, significant colony or foci formation compared to wild-type RIT1 ( $p < 0.05$  by one-tailed t-test). +/-,  $p < 0.15$  by one-tailed t-test.

Berger et al. Supplementary Table 4 is included as an accompanying excel file.



Berger et al. Supplementary Table 5 is included as an accompanying excel file.

## SUPPLEMENTARY REFERENCES

44. Comprehensive genomic characterization defines human glioblastoma genes and core pathways. *Nature* **455**, 1061-1068 (2008).
45. Taylor, B.S., *et al.* Integrative genomic profiling of human prostate cancer. *Cancer Cell* **18**, 11-22 (2010).
46. Barretina, J., *et al.* Subtype-specific genomic alterations define new targets for soft-tissue sarcoma therapy. *Nat Genet* **42**, 715-721 (2010).
47. Integrated genomic analyses of ovarian carcinoma. *Nature* **474**, 609-615 (2011).
48. Comprehensive molecular portraits of human breast tumours. *Nature* **490**, 61-70 (2012).
49. Hammerman, P.S., *et al.* Comprehensive genomic characterization of squamous cell lung cancers. *Nature* **489**, 519-525 (2012).
50. Comprehensive molecular characterization of human colon and rectal cancer. *Nature* **487**, 330-337 (2012).
51. Biankin, A.V., *et al.* Pancreatic cancer genomes reveal aberrations in axon guidance pathway genes. *Nature* **491**, 399-405 (2012).
52. Genomic and Epigenomic Landscapes of Adult De Novo Acute Myeloid Leukemia. *N Engl J Med* (2013).
53. Kandoth, C., *et al.* Integrated genomic characterization of endometrial carcinoma. *Nature* **497**, 67-73 (2013).
54. Larkin MA, Blackshields G, Brown NP, Chenna R, McGettigan PA, McWilliam H *et al* (2007). Clustal W and Clustal X version 2.0. *Bioinformatics* **23**: 2947-2948.
